# Supplementary material for: Effects of RhCrOx Cocatalyst Loaded on Different Metal Doped LaFeO3 Perovskites with Photocatalytic Hydrogen Performance under Visible Light Irradiation
Source: MDPI journal article supplement (doi:10.3390/catal11050612), 2021-05-11
Supplement: s1 [file s1]

## Supporting Information

Effects of RhCrO<sub>x</sub> cocatalyst loaded on different metal doped LaFeO<sub>3</sub> perovskites with photocatalytic hydrogen performance under visible-light irradiation

Tzu Hsuan Chiang\*, Gujjula Viswanath, Yu-Si Chen  
Department of Energy Engineering, National United University  
2, Lienda, Nan-Shi Li, Miaoli, 36003, Taiwan, R.O.C.  
\*thchiang@nuu.edu.tw

Table S1. Electronegativities and the number of atoms for different metals.

| Metal | Electron affinity<br>(eV) | Ionization energy<br>(eV) |
|-------|---------------------------|---------------------------|
| La    | 0.500                     | 57                        |
| Fe    | 0.151                     | 26                        |
| O     | 1.461                     | 8                         |
| Pr    | 0.116                     | 59                        |
| Ca    | 0.024                     | 20                        |
| Mg    | 0.962                     | 12                        |
| Y     | -0.415                    | 39                        |
| Eu    | 0.131                     | 63                        |
| Tb    | 0.383                     | 65                        |

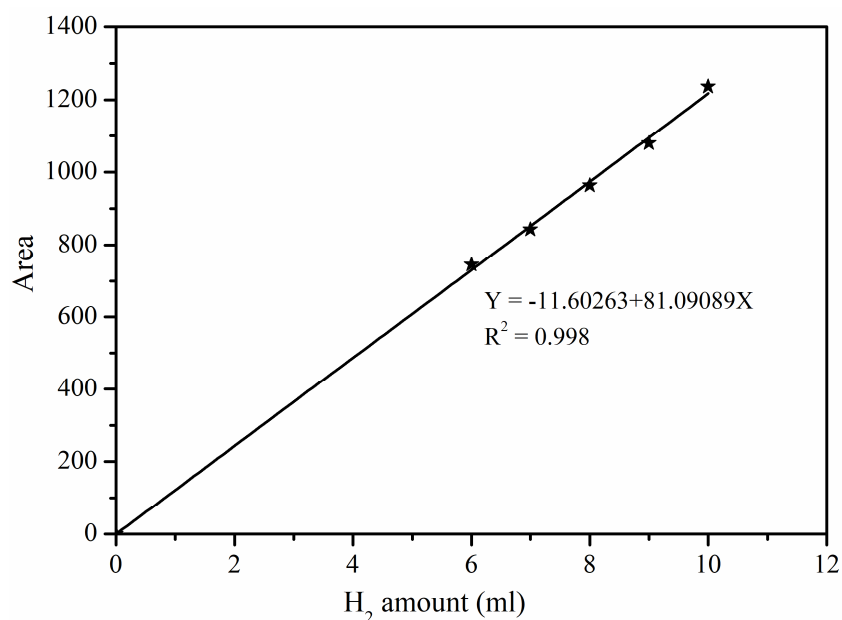

Figure S1. H<sub>2</sub> calibration curve
